# Supplementary material
Source: Springer Nature journal article supplement (https://www.springermedizin.de/resource/supplementary/12916_2013_895_MOESM8_ESM.pdf/9598560)
Supplement: MOESM8 [file 9598560]

---

**Asia, Central**

---

Armenia

Azerbaijan

Georgia

Kazakhstan

Kyrgyzstan

Tajikistan

Turkmenistan

Uzbekistan

---

**Asia, South**

---

Bhutan

Pakistan

---

**Asia, Southeast**

---

Indonesia

Seychelles

Thailand

---

**Caribbean**

---

Antigua and Barbuda

Barbados

Belize

Cuba

Dominica

Dominican Republic

Grenada

Guyana

---

**Caribbean (cont.)**

---

Jamaica

Saint Lucia

Suriname

The Bahamas

Trinidad and Tobago

---

**Latin America, Andean**

---

Bolivia

Ecuador

Peru

---

**Latin America, Central**

---

Colombia

Costa Rica

El Salvador

Honduras

Mexico

Nicaragua

Panama

Venezuela

---

**Latin America, Southern**

---

Argentina

Chile

Uruguay

---

**Latin America, Tropical**

---

Brazil

Paraguay

---

**North Africa / Middle East**

---

Algeria

Egypt

Iraq

Jordan

Lebanon

Libya

Morocco

Palestine

Saudi Arabia

Turkey

Yemen

---

**Oceania**

---

Fiji

Marshall Islands

---

**Sub-Saharan Africa, Southern**

---

Botswana

Lesotho

Namibia

South Africa

Swaziland

Zimbabwe

---

**Sub-Saharan Africa, West**

---

Cape Verde
